# Supplementary material
Source: HighWire-hosted journal article supplement (https://rapm.bmj.com/content/45/11/860)
Supplement: inline-supplementary-material-1 [file inline-supplementary-material-1.pdf]

**The Impact of Video games on Ultrasound-Guided Regional Anesthesia (USGRA) skills.**

Participant Number

Study Period

| Global Rating Scale for ultrasound-guided regional anesthesia. |                                                                                                              |         |                                                                                           |         |                                                                                                         |
|----------------------------------------------------------------|--------------------------------------------------------------------------------------------------------------|---------|-------------------------------------------------------------------------------------------|---------|---------------------------------------------------------------------------------------------------------|
| Please tick and score each of the 7 items below appropriately; |                                                                                                              |         |                                                                                           |         |                                                                                                         |
|                                                                | 1                                                                                                            | 2       | 3                                                                                         | 4       | 5                                                                                                       |
| <b>Preparation for procedure</b>                               | Did not organise equipment well<br>Has to stop procedure frequently<br>to prepare equipment.                 |         | Equipment generally organised.<br>Occasionally has to stop and<br>prepare items.          |         | All equipment neatly organised,<br>prepared and ready for use.                                          |
|                                                                | [     ]                                                                                                      | [     ] | [     ]                                                                                   | [     ] | [     ]                                                                                                 |
| <b>Time and motion</b>                                         | Many unnecessary moves.                                                                                      |         | Efficient time/motion but some<br>unnecessary moves.                                      |         | Clear economy of movement<br>and maximum efficiency.                                                    |
|                                                                | [     ]                                                                                                      | [     ] | [     ]                                                                                   | [     ] | [     ]                                                                                                 |
| <b>Instrument handling</b>                                     | Repeatedly makes tentative or<br>awkward moves with instruments.                                             |         | Competent use of instruments<br>but occasionally appeared stiff<br>or awkward.            |         | Fluid moves with instruments<br>and no awkwardness.                                                     |
|                                                                | [     ]                                                                                                      | [     ] | [     ]                                                                                   | [     ] | [     ]                                                                                                 |
| <b>Flow of Procedure</b>                                       | Frequently stopped procedure<br>and seemed unsure of next move.                                              |         | Demonstrated some forward<br>planning with reasonable<br>progression of procedure.        |         | Obviously planned course of<br>procedure with effortless flow<br>from one move to the next.             |
|                                                                | [     ]                                                                                                      | [     ] | [     ]                                                                                   | [     ] | [     ]                                                                                                 |
| <b>Image quality</b>                                           | Inadequate image. Target partially<br>visualised. Needle movement only<br>identifiable by tissue distortion. |         | Good image. Most of target<br>visualised. Needle tip and part of<br>needle shaft visible. |         | Outstanding image. Unequivocal<br>image with complete structure<br>visualised. Whole of needle visible. |
|                                                                | [     ]                                                                                                      | [     ] | [     ]                                                                                   | [     ] | [     ]                                                                                                 |
| <b>Knowledge of procedure</b>                                  | Deficient knowledge.                                                                                         |         | Knew all important steps of<br>procedure                                                  |         | Demonstrated familiarity with all<br>aspects of procedure                                               |
|                                                                | [     ]                                                                                                      | [     ] | [     ]                                                                                   | [     ] | [     ]                                                                                                 |
| <b>Overall performance</b>                                     | Very poor.                                                                                                   |         | Competent.                                                                                |         | Clearly superior.                                                                                       |
|                                                                | [     ]                                                                                                      | [     ] | [     ]                                                                                   | [     ] | [     ]                                                                                                 |
